# Supplementary material for: Sulfate formation via aerosol-phase SO 2 oxidation by model biomass burning photosensitizers: 3,4-dimethoxybenzaldehyde, vanillin and syringaldehyde using single-particle mixing-state analysis
Source: Copernicus journal article supplement (doi:10.5194/acp-23-5251-2023), 2023-05-10
Supplement: Supplementary file 1 [file acp-23-5251-2023-supplement.pdf]

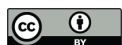

*Supplement of*

**Sulfate formation via aerosol-phase SO<sub>2</sub> oxidation by model biomass burning photosensitizers: 3,4-dimethoxybenzaldehyde, vanillin and syringaldehyde using single-particle mixing-state analysis**

**Liyuan Zhou et al.**

*Correspondence to:* Liyuan Zhou (liyuanzhou3-c@my.cityu.edu.hk) and Chak K. Chan (chak.chan@kaust.edu.sa, chak.k.chan@cityu.edu.hk)

The copyright of individual parts of the supplement might differ from the article licence.

**Text S1.** Measurement of the photon flux.

In this work, 2-nitrobenzaldehyde (2NB), a chemical actinometer, was used to determine the photon flux in the OFR according to Liang et al. (2022). Briefly, a quartz glass vial containing 50  $\mu\text{M}$  2NB water solution was hung in the center of the OFR, and its photolysis was monitored by determining the concentration of 2NB every 5 min for a total of 25 min. The concentration of 2NB was measured using UHPLC-PDA (UHPLC, Waters Acquity H-Class, Waters, Milford, USA) and detailed settings can be found elsewhere (Mabato et al., 2022). The channel with UV absorption at 254 nm was used for the quantification of 2NB. The concentration of 2NB in the glass vial followed exponential decay, and its decay rate constant was determined using the following equation:

$$\ln\left(\frac{[2NB]_t}{[2NB]_0}\right) = -j(2NB) \times t, \quad (1)$$

where  $[2NB]_t$  and  $[2NB]_0$  are the 2NB concentrations at time  $t$  and 0, respectively. The following equation can also be used to calculate  $j(2NB)$ :

$$j(2NB) = 2.303 \times (10^3 \text{ cm}^3 \text{ L}^{-1} \times 1 \text{ mol/N}_A) \times \sum (I_\lambda \times \Delta\lambda \times \varepsilon_{2NB,\lambda} \times \Phi_{2NB}), \quad (2)$$

where  $N_A$  is Avogadro's number,  $I_\lambda$  is the actinic flux ( $\text{photons cm}^{-2} \text{ s}^{-1} \text{ nm}^{-1}$ ),  $\Delta\lambda$  is the wavelength interval between actinic flux data points (nm), and  $\varepsilon_{2NB,\lambda}$  and  $\Phi_{2NB}$  are the base-10 molar absorptivity ( $\text{M}^{-1} \text{ cm}^{-1}$ ) and quantum yield ( $\text{molecule photon}^{-1}$ ) for 2NB, respectively. Values of  $\varepsilon_{2NB,\lambda}$  at each wavelength under 298 K and a wavelength-independent  $\Phi_{2NB}$  were adapted from Galbavy et al. (2010). The transmission (%) of the quartz glass vial (one wall) was measured stable at  $90 \pm 2\%$  (Liang et al., 2022), and therefore the photon flux was corrected by a factor of 1.11.

The spectral shape of the photon output of our illumination system (i.e., the relative flux at each wavelength) was measured using a high-sensitivity spectrophotometer (Brolight Technology Co. Ltd, Hangzhou, China). Using a scaling factor (SF), this measured relative photon output,  $I_{\lambda, \text{relative}}$ , is related to  $I_\lambda$  as follows:

$$I_\lambda = I_{\lambda, \text{relative}} \times \text{SF}, \quad (3)$$

$I_\lambda$  was obtained by combining (1), (2), and (3), as shown in Figure S1. The actinic flux during typical haze over Beijing ( $40^\circ\text{N}$ ,  $116^\circ\text{E}$ ) on January 26, 2015 at 12:00 pm (GMT+8) was estimated using the National Center for Atmospheric Research Tropospheric Ultraviolet Visible (TUV) Radiation Model (Figure S1) (Che et al., 2015; Che et al., 2014). The input environmental parameters were set to be as follows: clouds optical depth = 0, base = 4, top = 5; aerosol optical depth = 2.3, single scattering albedo = 0.9, Angstrom exponent = 0.9; direct beam = diffuse down = diffuse up = 1. For clear days, the actinic flux was estimated over Beijing (at the same date and time) using the default parameters.

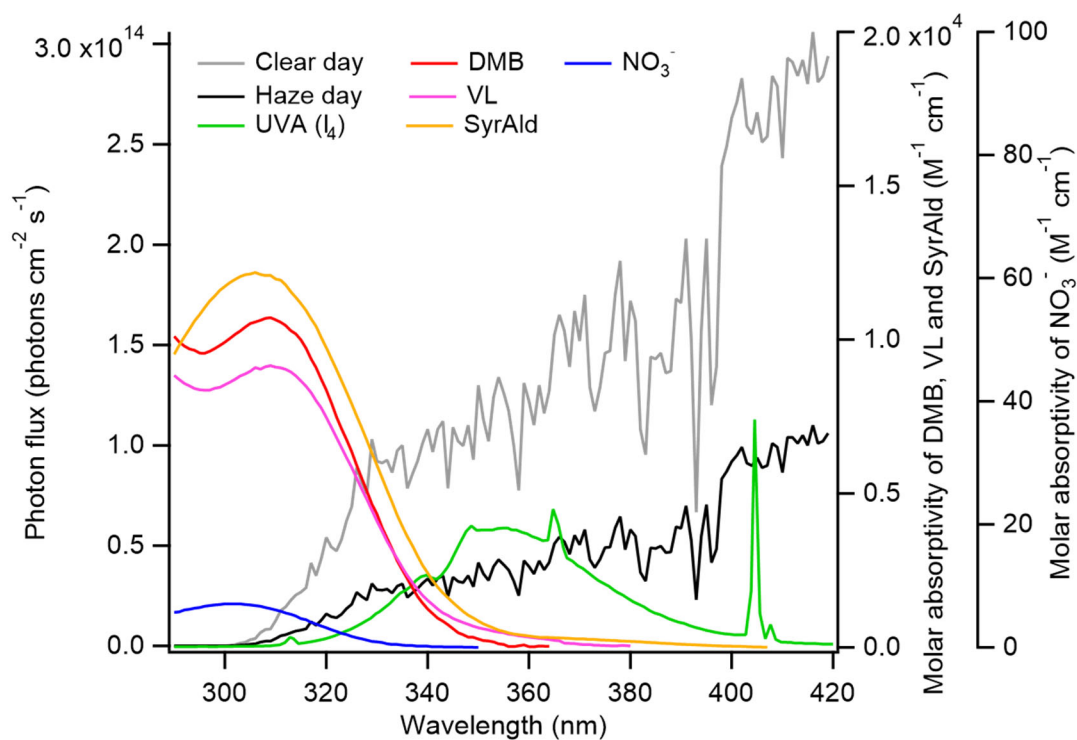

39

40 **Figure S1.** The molar absorptivities ( $\epsilon$ ,  $M^{-1} cm^{-1}$ ) of DMB, VL, SyrAld and  $NO_3^-$ , and photon flux in the OFR ( $I_4$ ) and during

41 typical haze days or clear days in Beijing, China.

42

(a)

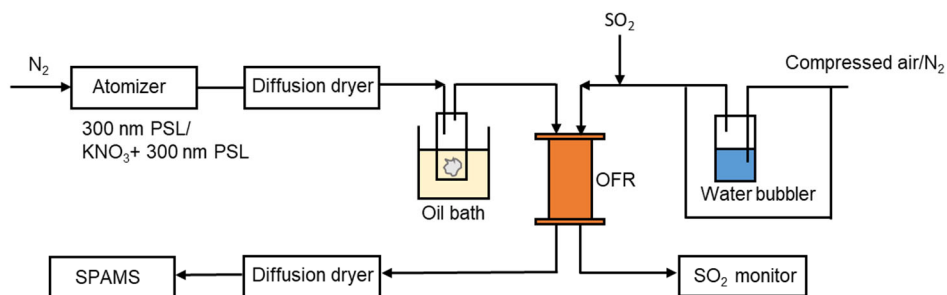

(b)

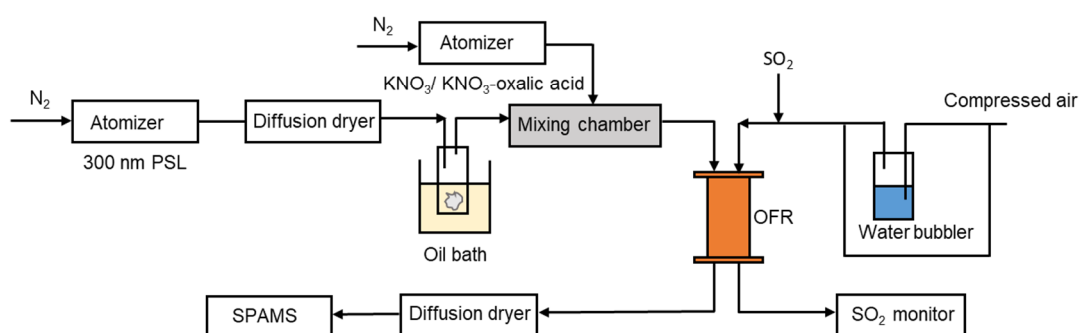

44

45

**Figure S2.** Schematic of the experimental setups for the generation of (a) DMB-, VL-, SyrAld-, or BA-coated particles and

46

internally mixed particles of  $\text{KNO}_3$  and VL and (b) externally mixed aerosol composed of a mix of  $\text{KNO}_3$  and VL-coated

47

particles. The coated particles were sent to the OFR for  $\text{SO}_2$  exposure and analyzed by the SPAMS for size and composition.

48

49

50

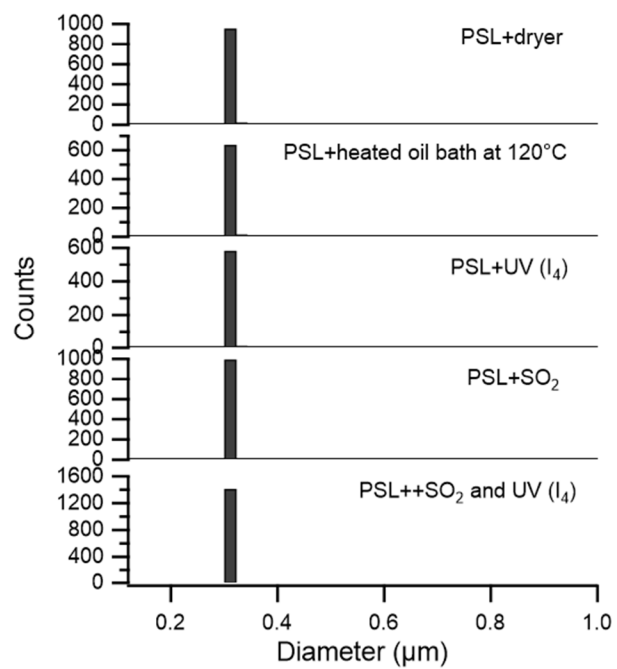

**Figure S3.** PSL condensation nuclei size characterization using SPAMS.

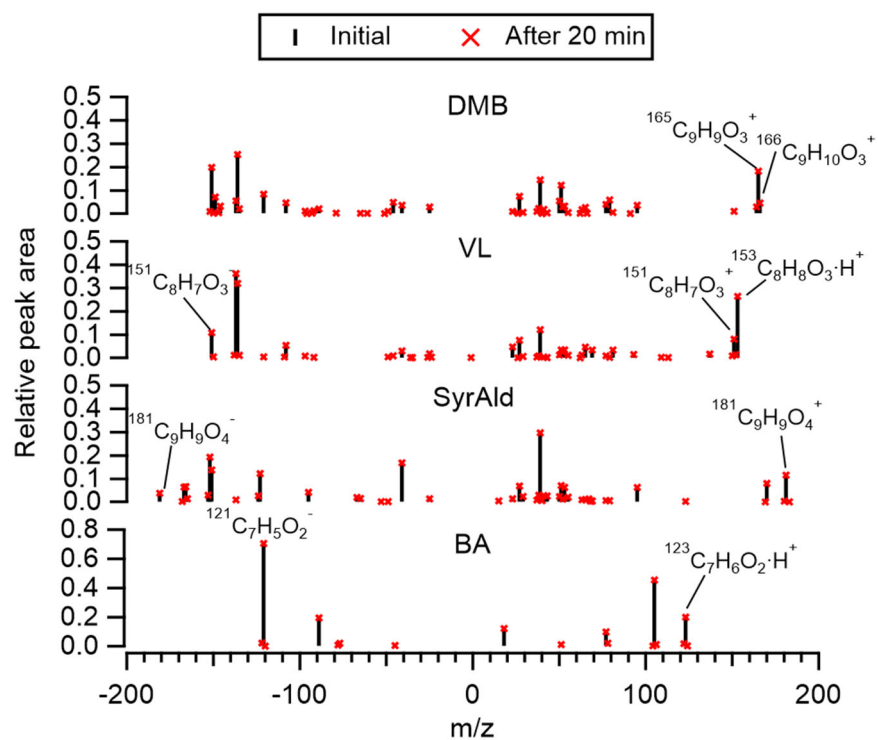

55

56 **Figure S4.** Mass spectra of the DMB-, VL-, SyrAld- and BA-coated particles at the beginning of the experiments (initial) and57 the end of the experiments (after 20 min) in the absence of light and  $\text{SO}_2$ .

58

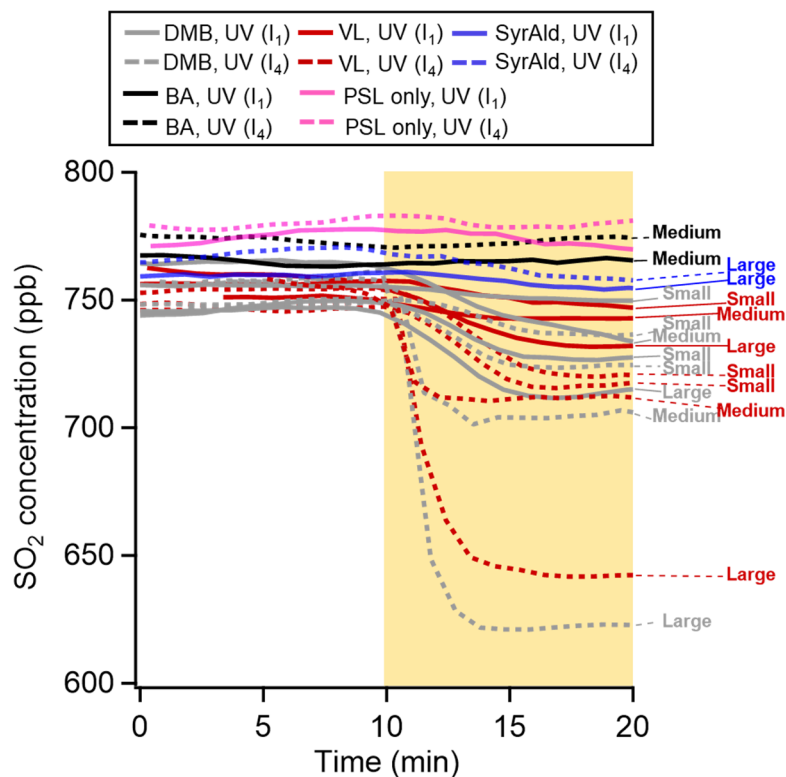

**Figure S5.** Time traces of SO<sub>2</sub> in the dark (0-10 min) and under UV irradiation (I<sub>1</sub> and I<sub>4</sub>) (10-20 min) in the presence of DMB-, VL-, SyrAld-, or BA-coated particles and PSL-only particles. The SO<sub>2</sub> consumption is presented as a function of the total surface area concentration of SPAMS detected particles. Total surface area concentrations in the range of  $7 \times 10^4$  -  $2 \times 10^5$   $\mu\text{m}^2$   $\text{m}^{-3}$  are denoted by “small”, in  $2 \times 10^5$  -  $6 \times 10^5$   $\mu\text{m}^2$   $\text{m}^{-3}$  as “medium”, and larger than  $6 \times 10^5$   $\mu\text{m}^2$   $\text{m}^{-3}$  as “large”.

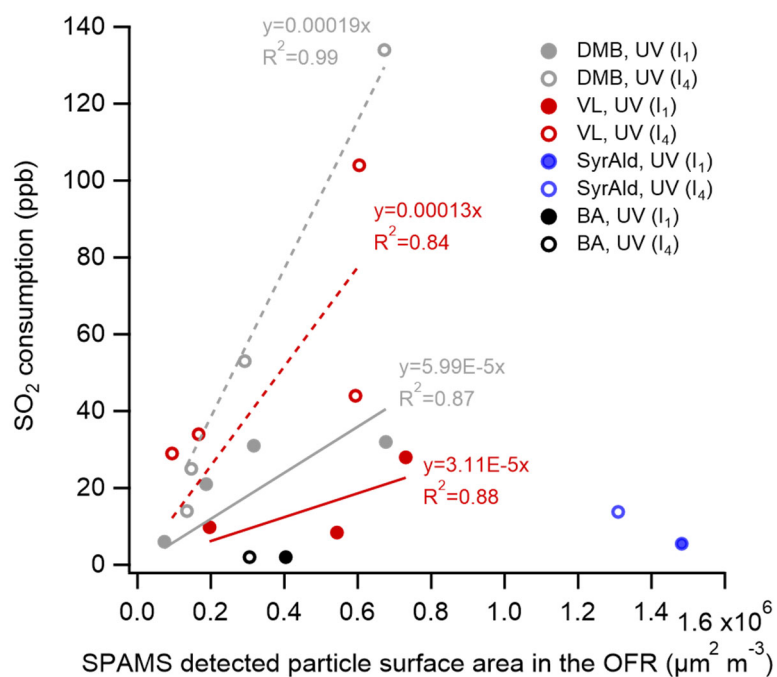

**Figure S6.** The SO<sub>2</sub> consumption under UV irradiation vs. the surface area of SPAMS detected particles in the OFR for DMB-, VL-, SyrAld- and BA-coated particles under UV irradiation and SO<sub>2</sub>.



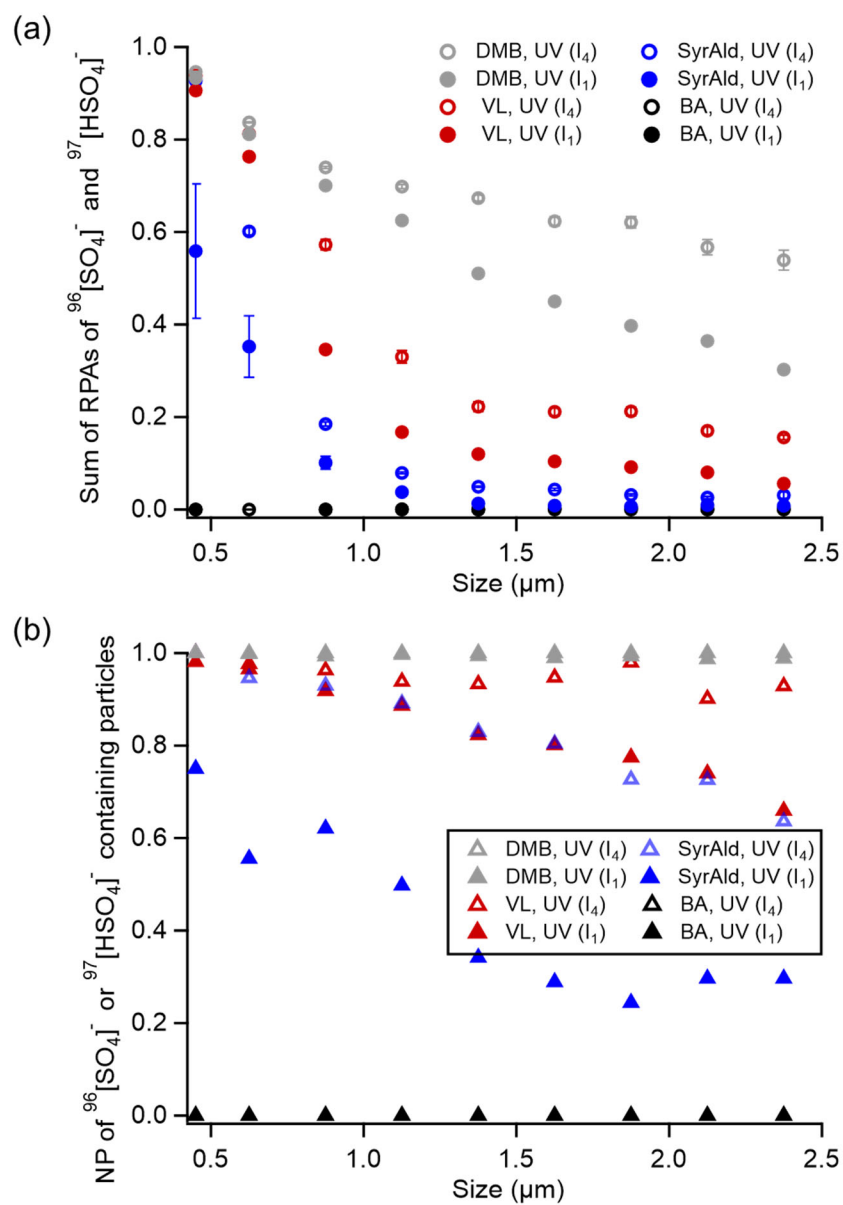

**Figure S7.** Size-dependent (a) RPA and (b) number percentage (NP) of sulfate for DMB-, VL-, SyrAld- and BA-coated particles under UV irradiation and in the presence of  $\text{SO}_2$ . Errors are shown by 95% confidence intervals.

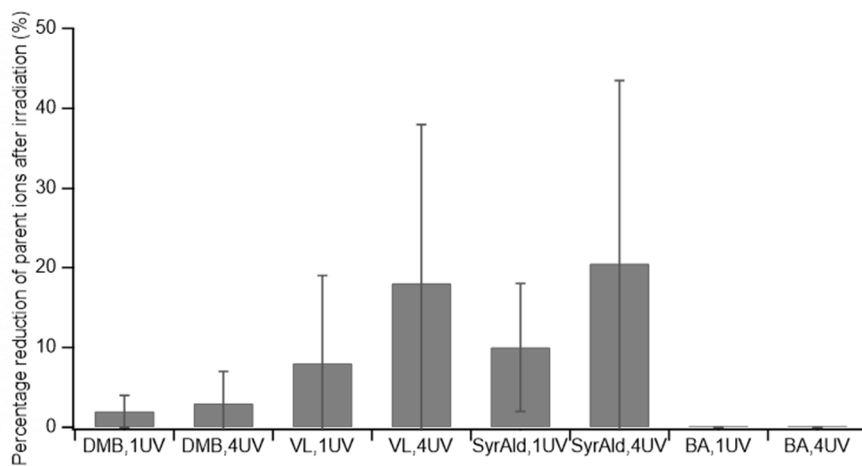

**Figure S8.** The percentage reduction of the RPA of parent ions in the positive spectra after UV irradiation. Error bars represent the standard deviation ( $1\sigma$ ).

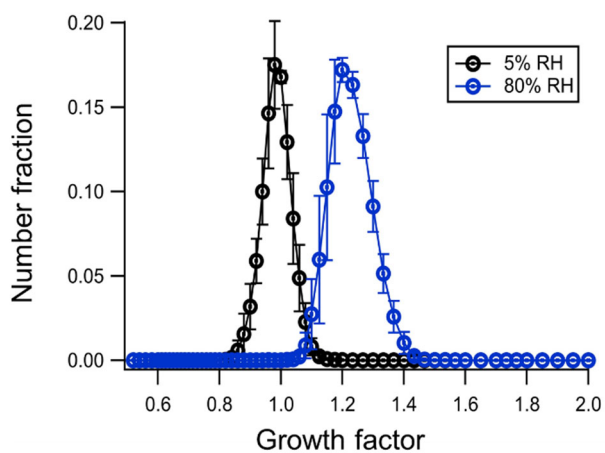

**Figure S9.** Hygroscopic growth factor distribution for  $\text{KNO}_3$  particles at 5% and 80% RH. The measurements were performed using a Hygroscopicity-tandem differential mobility analyzer (HTDMA) system (Model 3100, Brechtel Manufacturing Inc, USA). Error bars represent the standard deviation ( $1\sigma$ ).

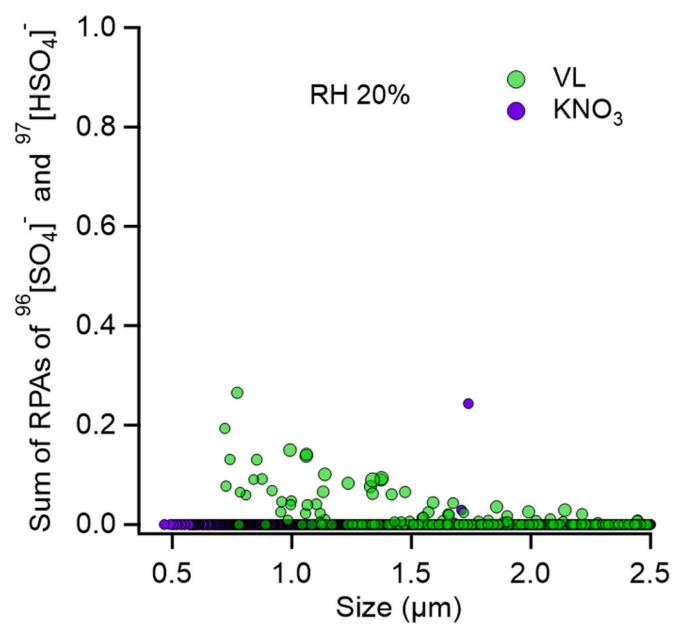

**Figure S10.** Sulfate RPA vs. particle diameter detected by the SPAMS for externally mixed VL-coated particles and  $\text{KNO}_3$  at 20% RH under UV irradiation ( $I_1$ ) in the presence of  $\text{SO}_2$ .

| Reaction conditions                                                              | RH (%)    | Gas in the OFR                     | UV intensity (photon cm <sup>-2</sup> s <sup>-1</sup> ) |
|----------------------------------------------------------------------------------|-----------|------------------------------------|---------------------------------------------------------|
| DMB-coated particles                                                             | 80        | CA <sup>a</sup> and N <sub>2</sub> | I <sub>1</sub> and I <sub>4</sub> <sup>b</sup>          |
| VL-coated particles                                                              | 80        | CA <sup>a</sup> and N <sub>2</sub> | I <sub>1</sub> and I <sub>4</sub> <sup>b</sup>          |
| SyrAld-coated particles                                                          | 80        | CA <sup>a</sup> and N <sub>2</sub> | I <sub>1</sub> and I <sub>4</sub> <sup>b</sup>          |
| BA-coated particles                                                              | 80        | CA <sup>a</sup>                    | I <sub>1</sub> and I <sub>4</sub> <sup>b</sup>          |
| Externally mixed VL-coated particles and KNO <sub>3</sub>                        | 80 and 20 | CA <sup>a</sup>                    | I <sub>1</sub> <sup>b</sup>                             |
| Externally mixed VL-coated particles and KNO <sub>3</sub> -oxalic acid particles | 80        | CA <sup>a</sup>                    | I <sub>1</sub> <sup>b</sup>                             |
| Internally mixed VL and KNO <sub>3</sub> particles                               | 80        | CA <sup>a</sup>                    | I <sub>1</sub> <sup>b</sup>                             |

<sup>a</sup> HEPA-filtered and activated-carbon-denuded compressed air.

<sup>b</sup> One and four lamps to provide a total irradiance of about  $1.1 \times 10^{15}$  (I<sub>1</sub>) and  $3.8 \times 10^{15}$  (I<sub>4</sub>) photon cm<sup>-2</sup> s<sup>-1</sup>, respectively.

**Table S2.** Chemical formula, structure, molar mass and property of the chemicals used in this study.

| Chemical compound         | Formula                                       | Structure                                                                           | Molar mass (g mol <sup>-1</sup> ) | Property <sup>a</sup>                                  |
|---------------------------|-----------------------------------------------|-------------------------------------------------------------------------------------|-----------------------------------|--------------------------------------------------------|
| 3,4-dimethoxybenzaldehyde | C <sub>9</sub> H <sub>10</sub> O <sub>3</sub> | 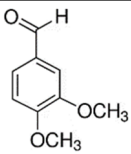  | 166.17                            | non-phenolic<br>methoxybenzaldehyde<br>photosensitizer |
| vanillin                  | C <sub>8</sub> H <sub>8</sub> O <sub>3</sub>  |  | 152.15                            | phenolic<br>methoxybenzaldehyde<br>photosensitizer     |
| syringaldehyde            | C <sub>9</sub> H <sub>10</sub> O <sub>4</sub> |  | 182.17                            | phenolic<br>methoxybenzaldehyde<br>photosensitizer     |
| benzoic acid              | C <sub>7</sub> H <sub>6</sub> O <sub>2</sub>  |  | 122.123                           | non- photosensitizer                                   |

<sup>a</sup>The Photosensitizing properties are derived from the literature (Smith et al., 2015, 2016; Smith et al., 2014).

## 100 REFERENCES

- 101 Che, H., Xia, X., Zhu, J., Li, Z., Dubovik, O., Holben, B., Goloub, P., Chen, H., Estelles, V., and Cuevas-Agulló, E.: Column  
 102 aerosol optical properties and aerosol radiative forcing during a serious haze-fog month over North China Plain in 2013 based  
 103 on ground-based sunphotometer measurements, *Atmospheric Chemistry and Physics*, 14, 2125-2138, 2014.
- 104 Che, H., Xia, X., Zhu, J., Wang, H., Wang, Y., Sun, J., Zhang, X., and Shi, G.: Aerosol optical properties under the condition  
 105 of heavy haze over an urban site of Beijing, China, *Environmental Science and Pollution Research*, 22, 1043-1053, 2015.
- 106 Galbavy, E. S., Ram, K., and Anastasio, C.: 2-Nitrobenzaldehyde as a chemical actinometer for solution and ice photochemistry,  
 107 *Journal of Photochemistry and Photobiology A: Chemistry*, 209, 186-192, 2010.
- 108 Liang, Z., Zhou, L., Infante Cuevas, R. A., Li, X., Cheng, C., Li, M., Tang, R., Zhang, R., Lee, P. K., and Lai, A. C.: Sulfate  
 109 Formation in Incense Burning Particles: A Single-Particle Mass Spectrometric Study, *Environmental Science & Technology*  
 110 *Letters*, 2022.
- 111 Mabato, B. R. G., Lyu, Y., Ji, Y., Li, Y. J., Huang, D. D., Li, X., Nah, T., Lam, C. H., and Chan, C. K.: Aqueous secondary  
 112 organic aerosol formation from the direct photosensitized oxidation of vanillin in the absence and presence of ammonium  
 113 nitrate, *Atmospheric Chemistry and Physics*, 22, 273-293, 2022.
- 114 Smith, J. D., Sio, V., Yu, L., Zhang, Q., and Anastasio, C.: Secondary organic aerosol production from aqueous reactions of  
 115 atmospheric phenols with an organic triplet excited state, *Environmental science & technology*, 48, 1049-1057, 2014.
- 116 Smith, J. D., Kinney, H., and Anastasio, C.: Aqueous benzene-diols react with an organic triplet excited state and hydroxyl  
 117 radical to form secondary organic aerosol, *Physical Chemistry Chemical Physics*, 17, 10227-10237, 2015.
- 118 Smith, J. D., Kinney, H., and Anastasio, C.: Phenolic carbonyls undergo rapid aqueous photodegradation to form low-volatility,  
 119 light-absorbing products, *Atmospheric Environment*, 126, 36-44, 2016.

120
